# Supplementary material for: Synthesis and Characterization of Multifunctional Fluorescent-Magnetic Platinum Nanoclusters
Source: PubMed Central journal article supplement — ACS Omega. 2024 Dec 13;9(51):50349–56. doi: 10.1021/acsomega.4c06765 (PMC11683621; doi:10.1021/acsomega.4c06765), 2024-12-13
Supplement: ao4c06765_si_001.pdf [file ao4c06765_si_001.pdf]

# Supporting Information

## Synthesis and Characterization of Multifunctional Fluorescent-Magnetic Platinum Nanoclusters

Shin-ichi Tanaka <sup>1,\*</sup>, Kohei Yamagami<sup>2</sup>, Kazuhisa Sato<sup>3,4</sup>, Hidehiro Yasuda<sup>3,4</sup> Hirohiko Niioka<sup>5</sup>  
and Hiroki Wadati<sup>6,7</sup>

<sup>1</sup> National Institute of Technology, Kure College, 2-2-11 Agaminami, Kure, Hiroshima, 737-8506 Japan.

<sup>2</sup> Japan Synchrotron Radiation Research Institute (JASRI), 1-1-1 Kouto, Sayo-cho, Sayo-gun, Hyogo 679-5198 Japan.

<sup>3</sup> Research Center for Ultra-High Voltage Electron Microscopy, Osaka University, 7-1 Mihogaoka, Ibaraki, Osaka 567-0047, Japan.

<sup>4</sup> Division of Materials and Manufacturing Science, Graduate School of Engineering, Osaka University, 2-1 Yamadaoka, Suita, Osaka 565-0871, Japan.

<sup>5</sup> Graduate School of Information Science and Technology, Osaka University, TechnoAlliance Building C607, 2-8 Yamadaoka, Suita, Osaka 565-0871 Japan.

<sup>6</sup> Department of Material Science, Graduate School of Science, University of Hyogo, 3-2-1 Kouto, Kamigori-cho, Ako-gun, Hyogo, 678-1297, Japan.

<sup>7</sup> Institute of Laser Engineering, Osaka University, 2-8 Yamadaoka, Suita, Osaka 565-0871, Japan.

\*Corresponding Author E-mail: s-tanaka@kure-nct.ac.jp

### Contents

**Experimental section**

**Supplementary Figures**

## **Experimental section**

**Cell Culture.** SK-BR-3 cells were grown in DMEM (Sigma-Aldrich, Japan) and were cultured with 10% fetal bovine serum (FBS) at 37°C and 5% CO<sub>2</sub>.

**MR images.** MR images of [PtNC(Ami)] were observed using a horizontal 7-T scanner (PharmaScan 70/16 US; Bruker Biospin, Ettlingen, Germany). And MR images were obtained with the following parameters: repetition time (TR)=200; echo time (TE)=16 ms; slice thickness=1.0 mm; field-of-view=60×30 mm<sup>2</sup>.

## Supplementary Figures

(a)

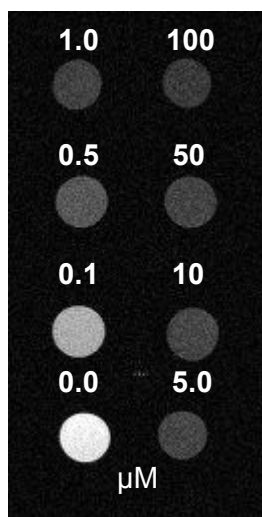

(b)

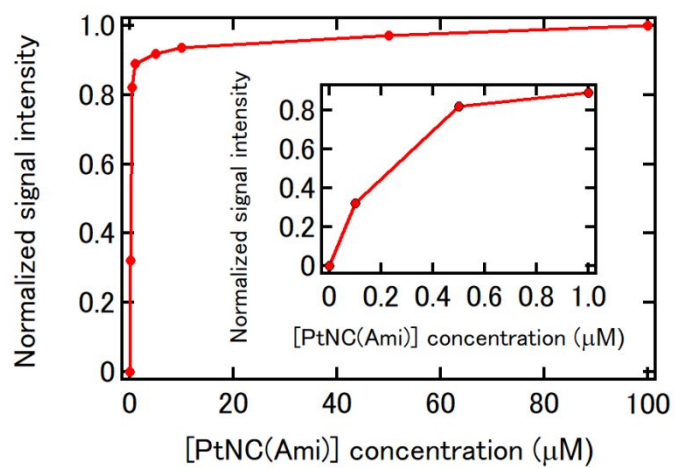

Figure S1. (a) T1-weighted MR images at different concentrations of [PtNC(Ami)] (0.0, 0.1, 0.5, 1.0, 5.0, 10, 50, 100 μM). (b) Normalized signal intensity of T1-weighted MR images. Inset shows enlarged normalized signal intensity from 0.0 to 1.0 μM.
